# Supplementary material for: Patients’ Fears and Perceptions Associated with Anesthesia
Source: MDPI journal article supplement (doi:10.3390/medicina58111577), 2022-11-01
Supplement: s1 [file s1]

**Table S1.** Results of multivariate logistic regression analysis: specific fears in relation to patients' characteristics.

| Question                                                                                                                             | 1                                             | 2                                             | 3                               | 4                                             | 5                                             | 6                              | 7                                             | 8                                         | 9                              | 10                                            | 11                                                       | 12                                            | 13                                                            | 14                                                         | 15                                            |
|--------------------------------------------------------------------------------------------------------------------------------------|-----------------------------------------------|-----------------------------------------------|---------------------------------|-----------------------------------------------|-----------------------------------------------|--------------------------------|-----------------------------------------------|-------------------------------------------|--------------------------------|-----------------------------------------------|----------------------------------------------------------|-----------------------------------------------|---------------------------------------------------------------|------------------------------------------------------------|-----------------------------------------------|
| Gender (female/male)                                                                                                                 | <b>3.07</b><br>(1.84-5.1)<br><b>p=0.001*</b>  | <b>2.4 (1.4-4.1)</b><br><b>p=0.001*</b>       | 1.75<br>(0.91-3.18)<br>p=0.065  | <b>2.59</b><br>(1.51-4.45)<br><b>p=0.001*</b> | <b>2.39</b><br>(1.24-4.59)<br><b>p=0.009*</b> | 1.84<br>(0.98-3.47)<br>p=0.057 | 1.69 (0.8-3.57)<br>p=0.173                    | <b>2.45 (1.3-4.61)</b><br><b>p=0.006*</b> | 2.05<br>(0.87-4.79)<br>p=0.099 | <b>2.46</b><br>(1.38-4.37)<br><b>p=0.002*</b> | <b>3.37</b><br>(1.45-7.88)<br><b>p=0.005*</b>            | <b>1.95</b><br>(1.07-3.54)<br><b>p=0.028*</b> | <b>2.16</b><br>(1.21-3.85)<br><b>p=0.01*</b>                  | <b>2.41 (1.4-4.15)</b><br><b>p=0.002*</b>                  | <b>2.61</b><br>(1.56-4.38)<br><b>p=0.001*</b> |
| Level of education (1. not literate/incomplete primary school; 2. primary school; 3. high school; 4. University degree/Master's/PhD) | 1,31<br>(0,99 - 1,74)<br>p=0,056              | 1,14<br>(0,85-1,54)<br>p=0,382                | 1,07<br>(0,76-1,51)<br>p=0,712  | 1,34<br>(0,99-1,82)<br>p=0,062                | 0,94<br>(0,64-1,37)<br>p=0,729                | 0,99<br>(0,69-1,43)<br>p=0,974 | 1,31<br>(0,85-2,01)<br>p=0,222                | 0,95<br>(0,66-1,38)<br>p=0,796            | 1,1 (0,66-1,81)<br>p=0,72      | 1,08<br>(0,78-1,49)<br>p=0,649                | <b>1,79</b><br>(1,06-3)<br><b>p=0,028</b>                | 0,89<br>(0,63-1,24)<br>p=0,483                | 0,92<br>(0,66-1,27)<br>p=0,611                                | 0,88<br>(0,65-1,2)<br>p=0,43                               | 0,99<br>(0,75-1,31)<br>p=0,945                |
| Socioeconomic status (1.bad; 2. fair; 3.good)                                                                                        | 1,09<br>(0,81-1,45)<br>p=0,577                | 1,16<br>(0,85-1,58)<br>p=0,343                | 1,2 (0,84-1,71)<br>p=0,307      | 0,86<br>(0,62-1,18)<br>p=0,344                | 0,9 (0,61-1,35)<br>p=0,729                    | 1,04<br>(0,71-1,51)<br>p=0,852 | 0,74<br>(0,47-1,16)<br>p=0,184                | 1,27<br>(0,87-1,84)<br>p=0,219            | 1,01<br>(0,61-1,67)<br>p=0,978 | <b>1,55</b><br>(1,11-2,15)<br><b>p=0,009</b>  | 1,47<br>(0,87-2,49)<br>p=0,146                           | 1,328<br>(0,92-1,89)<br>p=0,131               | <b>1,47</b><br>(1,04-2,07)<br><b>p=0,03</b>                   | 1,25 (0,9-1,73)<br>p=0,181                                 | 1,26<br>(0,94-1,7)<br>p=0,129                 |
| Type of surgery (peripheral arteries /carotid/aortic)                                                                                | 1.78<br>(0.69-4.55)<br>p=0.23                 | 1.76<br>(0.65-4.77)<br>p=0.265                | 0.437<br>(0.48-5.35)<br>p=0.437 | 1.67<br>(0.63-4.42)<br>p=0.303                | 0.24<br>(0.03-1.9)<br>p=0.176                 | 0.56<br>(0.12-2.69)<br>p=0.467 | 0.96<br>(0.21-4.51)<br>p=0.862                | 0.77<br>(0.48-1.23)<br>p=0.272            | 2.05<br>(0.52-8.16)<br>p=0.308 | 0.91 (0.3-2.75)<br>p=0.871                    | <b>5 (1.28-20.53)</b><br><b>p=0.026*</b><br><sup>a</sup> | 2.67<br>(0.85-8.41)<br>p=0.092                | <b>4.44</b><br>(1.59-12.4)<br><b>p=0.004*</b><br><sup>b</sup> | <b>3.8 (1.18-12.23)</b><br><b>p=0.025*</b><br><sup>c</sup> | 1.76<br>(0.67-4.61)<br>p=0.248                |
| Type of anesthesia (general/regional)                                                                                                | 1.72<br>(0.66-4.48)<br>p=0.162                | 1.79<br>(0.65-4.9)<br>p=0.259                 | 0.93<br>(0.28-3.09)<br>p=0.91   | 1.69<br>(0.89-3.2)<br>p=0.108                 | 0.21<br>(0.03-2.15)<br>p=0.147                | 0.5 (0.1-2.41)<br>p=0.386      | 0.77<br>(0.17-3.55)<br>p=0.737                | 1.56<br>(0.49-4.99)<br>p=0.451            | 2.72<br>(0.64-11.46)<br>p=0.44 | 1.89<br>(0.95-3.75)<br>p=0.069                | 3.3 (0.85-12.84)<br>p=0.084                              | 1.96<br>(0.63-6.14)<br>p=0.246                | <b>5.63</b><br>(1.96-16.17)<br><b>p=0.001*</b>                | 2.38<br>(0.82-6.88)<br>p=0.11                              | 1.76<br>(0.66-4.68)<br>p=0.257                |
| Previous surgery and anesthesia (yes/no)                                                                                             | <b>0.65</b><br>(0.44-0.96)<br><b>p=0.031*</b> | <b>0.6 (0.4-0.91)</b><br><b>p=0.017*</b>      | 0.65 (0.4-1.05)<br>p=0.079      | 0.93<br>(0.61-1.44)<br>p=0.759                | 0.87 (0.5-1.49)<br>p=0.603                    | 0.73<br>(0.44-1.22)<br>p=0.226 | <b>0.48</b><br>(0.26-0.88)<br><b>p=0.018*</b> | 0.82<br>(0.49-1.38)<br>p=0.458            | 0.82<br>(0.41-1.62)<br>p=0.564 | 0.98<br>(0.62-1.54)<br>p=0.923                | 0.81 (0.4-1.67)<br>p=0.571                               | <b>0.61</b><br>(0.37-1)<br><b>p=0.048*</b>    | 0.77<br>(0.48-1.23)<br>p=0.272                                | 0.64<br>(0.41-1)<br>p=0.052                                | 0.69<br>(0.46-1.04)<br>p=0.075                |
| Personal knowledge of an anesthesiologist (no/yes)                                                                                   | 1.41<br>(0.87-2.28)<br>p=0.162                | <b>2.53</b><br>(1.43-4.48)<br><b>p=0.001*</b> | 1.33<br>(0.71-2.49)<br>p=0.377  | 1.06<br>(0.64-1.76)<br>p=0.828                | 1.1 (0.56-2.15)<br>p=0.788                    | 1.38 (0.7-2.69)<br>p=0.351     | 1.89<br>(0.79-4.53)<br>p=0.153                | 1.98<br>(0.95-4.11)<br>p=0.068            | 2.85<br>(0.95-8.53)<br>p=0.061 | 1.47<br>(0.82-2.61)<br>p=0.192                | 2.38<br>(0.82-6.9)<br>p=0.112                            | 1.41<br>(0.73-2.76)<br>p=0.309                | <b>2.57</b><br>(1.28-5.15)<br><b>p=0.001*</b>                 | 1.47<br>(0.82-2.64)<br>p=0.195                             | 1.6 (0.96-2.65)<br>p=0.072                    |

**Legend:** odds ratio, 95% confidence interval, \* statistically significant, <sup>a</sup> peripheral arteries, <sup>b</sup> carotid and aortic, <sup>c</sup> carotid.
