# Supplementary material for: Patients’ Fears and Perceptions Associated with Anesthesia
Source: MDPI journal article supplement (doi:10.3390/medicina58111577), 2022-11-01
Supplement: s1 [file s1]

**Table S2.** Percentages of correct answers to the questions regarding knowledge of anesthesia and differences regarding gender, age, education level, place of residence, and previous surgery.

| Question                                                                         | Gender |        |              | Age (years) |      |          | Education (years) |      |              | Place of residence |          |              | Previous surgery |      |              |
|----------------------------------------------------------------------------------|--------|--------|--------------|-------------|------|----------|-------------------|------|--------------|--------------------|----------|--------------|------------------|------|--------------|
|                                                                                  | male   | female | <i>p</i>     | ≤67         | >67  | <i>p</i> | ≤8                | >8   | <i>p</i>     | city               | province | <i>p</i>     | no               | yes  | <i>p</i>     |
| 1. Do anesthesiologists must have a medical degree?                              | 73.8   | 71.2   | 0.65         | 71.6        | 75   | 0.448    | 69                | 74.5 | 0.305        | 75.8               | 68.4     | 0.12         | 69.7             | 75.4 | 0.216        |
| 2. Where does the anesthesiologist work?                                         | 18     | 16.2   | 0.71         | 18.3        | 17   | 0.747    | 10.3              | 19.8 | <b>0.042</b> | 21.8               | 9.8      | <b>0.003</b> | 16.6             | 18.3 | 0.657        |
| 3. Who puts the patient to sleep for surgery?                                    | 87.9   | 88.8   | 0.829        | 89.3        | 86.7 | 0.425    | 74.7              | 91.9 | <b>0.001</b> | 91.7               | 81.2     | <b>0.003</b> | 87.6             | 88.3 | 0.827        |
| 4. Who wakes the patient up at the end of the operation?                         | 57     | 41.2   | <b>0.012</b> | 53.8        | 53.7 | 0.987    | 31                | 60.4 | <b>0.001</b> | 57.5               | 46.6     | <b>0.041</b> | 44.8             | 59.2 | <b>0.006</b> |
| 5. Who monitors the functioning of vital organs during surgery?                  | 54.1   | 55     | 0.885        | 58.4        | 50   | 0.099    | 39.1              | 58.7 | <b>0.001</b> | 58.7               | 45.9     | <b>0.016</b> | 47.6             | 58.3 | <b>0.04</b>  |
| 6. At what stages of surgery does the anesthesiologist take care of the patient? | 19.7   | 22.5   | 0.575        | 20.8        | 19.7 | 0.782    | 13.8              | 22.1 | 0.088        | 23                 | 15       | 0.064        | 20.7             | 20   | 0.807        |
| 7. Are anesthesiologist and nurse anesthetist the same?                          | 46.6   | 36.2   | 0.099        | 47.7        | 41   | 0.182    | 28.7              | 49   | <b>0.001</b> | 49.2               | 35.3     | <b>0.009</b> | 42.8             | 45.4 | 0.611        |
| 8. Does the nurse anesthetist have to be specially trained?                      | 63.6   | 65     | 0.817        | 62.4        | 65.4 | 0.542    | 52.9              | 67.1 | <b>0.015</b> | 69.8               | 52.6     | <b>0.001</b> | 60.7             | 65.8 | 0.309        |
| 9. To what extent does an anesthesiologist influence the outcome of surgery?     | 50.5   | 42.5   | 0.203        | 51.8        | 45.7 | 0.237    | 32.2              | 53.7 | <b>0.001</b> | 53.6               | 39.8     | <b>0.01</b>  | 46.2             | 50.4 | 0.423        |
